# Supplementary material
Source: Research Square preprint supplement (doi:10.21203/rs.3.rs-9696316/v1)
Supplement: Supplementary file 1 [file 85f196b153ccc7db891665b6.docx]

Table 6. Country-specific perceptions of corticosteroid self-medication without prescription among adults and children.

|  | Adults | | Children | | |
| --- | --- | --- | --- | --- | --- |
|  | **Oral**  **n (%)** | **Injectable**  **n (%)** | | **Oral**  **n (%)** | **Injectable**  **n (%)** | |
| TOTAL | 179 (50.9) | 106 (30.1) | | 127 (33.9) | 65 (17.4) | |
| Professional categories |  |  | |  |  | |
| Community pharmacists | 38 (62) | 18 (30) | | 21 (34) | 8 (13) | |
| Prescribers | 141 (49) | 88 (30) | | 106 (34) | 57 (18) | |
| Countries |  |  | |  |  | |
| Africa | 21 (100) | 9 (42.9) | | 15 (71.4) | 3 (14.3) | |
| Australia & Asia (others) | 8 (47.1) | 5 (29.4) | | 7 (36.8) | 5 (26.3) | |
| India | 17 (81) | 9 (42.9) | | 20 (51.3) | 9 (23.1) | |
| Brazil | 20 (80) | 14 (56) | | 19 (76) | 6 (24) | |
| Columbia | 17 (89.5) | 16 (84.2) | | 12 (63.2) | 11 (57.9) | |
| Latin America (others) | 34 (70.8) | 27 (56.3) | | 23 (46) | 12 (24) | |
| North America | 2 (11.1) | 0 | | 1 (5.6) | 1 (5.6) | |
| Greece | 23 (57.5) | 7 (17.5) | | 16 (40) | 5 (12.5) | |
| Portugal | 8 (29.6) | 3 (11.1) | | 1 (3.7) | 1 (3.7) | |
| Spain | 10 (27.8) | 1 (2.8) | | 2 (5.6) | 1 (2.8) | |
| UK | 4 (18.2) | 1 (4.5) | | 1 (4.5) | 0 | |
| Europe (others) | 15 (25.9) | 14 (24.1) | | 10 (16.9) | 11 (19) | |
