# Supplementary material
Source: Research Square preprint supplement (doi:10.21203/rs.3.rs-9696316/v1)
Supplement: Supplementary file 2 [file 8a2ceb25d321dad39d85e04f.docx]

Supplementary table 1. Detailed country-level distribution of respondents

| Countries | n | % |
| --- | --- | --- |
| Argentina | 6 | 1.6 |
| Australia | 5 | 1.3 |
| Bangladesh | 2 | 0.5 |
| Belgium | 1 | 0.3 |
| Bermuda | 1 | 0.3 |
| Brazil | 25 | 6.6 |
| Canada | 15 | 4.0 |
| Chile | 13 | 3.5 |
| China | 3 | 0.8 |
| Columbia | 19 | 5.1 |
| Costa Rica | 17 | 4.5 |
| Cyprus | 2 | 0.5 |
| Dominican Republic | 1 | 0.3 |
| France | 4 | 1.1 |
| Georgia | 1 | 0.3 |
| Greece | 40 | 10.6 |
| India | 39 | 10.4 |
| Ireland | 2 | 0.5 |
| Israel | 5 | 1.3 |
| Kyrgyz Republic | 2 | 0.5 |
| Mexico | 1 | 0.3 |
| Netherlands | 1 | 0.3 |
| Norway | 6 | 1.6 |
| Pakistan | 5 | 1.3 |
| Panama | 10 | 2.7 |
| Portugal | 27 | 7.2 |
| Republic of North Macedonia | 14 | 3.7 |
| Romania | 1 | 0.3 |
| Singapore | 2 | 0.5 |
| Slovenia | 1 | 0.3 |
| Spain | 36 | 9.6 |
| Sri Lanka | 1 | 0.3 |
| Sweden | 11 | 2.9 |
| Switzerland | 1 | 0.3 |
| Tunisia | 2 | 0.5 |
| Turkey | 9 | 2.4 |
| Uganda | 3 | 0.8 |
| UK | 22 | 5.9 |
| USA | 2 | 0.5 |
| Peru | 2 | 0.5 |
| Nigeria | 16 | 4.3 |
